# Supplementary material for: Multifunctional cadmium single source precursor for the selective deposition of CdO or CdS by a solution route
Source: Royal Society of Chemistry journal article supplement (doi:10.1039/b509623e), 2005-01-01

## Electronic Supplementary Information

### Multifunctional cadmium single source precursor for the selective deposition of CdO or CdS films from a solution route

Graziella Malandrino,<sup>\*a</sup> Sebastiana T. Finocchiaro,<sup>a</sup> Patrizia Rossi,<sup>b</sup> Paolo Dapporto,<sup>b</sup> and Ignazio L. Fragalà<sup>a</sup>

<sup>a</sup>*Dipartimento di Scienze Chimiche, Università di Catania, and INSTM, UdR Catania, V.le Andrea Doria 6, I-95125 Catania, Italy*

<sup>b</sup>*Dipartimento Energetica "S. Stecco", Università di Firenze, Via Santa Marta 3, I-50139 Firenze, Italy*

E-mail: [gmandrino@dipchi.unict.it](mailto:gmandrino@dipchi.unict.it)

**Experimental.** Elemental microanalyses were performed in the Analytical Laboratories of the University of Catania. <sup>1</sup>H NMR spectra were recorded on a Varian Inova 500 spectrometer. Infrared spectra were recorded on a Perkin Elmer FTIR 1720 spectrometer as nujol mulls between NaCl plates. Thermogravimetric analyses were performed by using a Mettler Toledo TGA/SDTA 851<sup>e</sup>. Weights of the samples were between 10-15 mg (TGA). Analyses were made under prepurified nitrogen using a 5°C/min heating rate.

The <sup>1</sup>H NMR spectrum of the Cd(tta)<sub>2</sub>•tmed adduct shows a singlet at  $\delta = 6.12$  ppm, whose integration accounts for the two protons, one for each tta ring. The multiplets at  $\delta = 7.07$ ,  $\delta = 7.47$  and  $\delta = 7.60$  represents the resonance of the protons of the tiophene ring. In addition, multiplets at  $\delta = 2.51$  and  $\delta = 2.63$  represent resonances of the six and four protons, respectively, of the tmed methylic and methylenic groups.

The <sup>13</sup>C NMR spectrum of the Cd(TTA)<sub>2</sub>•tmed adduct shows a singlet at  $\delta = 47.06$  and a singlet at  $\delta = 56.82$ , associated with carbons of the methylic and methylenic groups, respectively, of the

---

<sup>\*</sup> E-mail: [gmandrino@dipchi.unict.it](mailto:gmandrino@dipchi.unict.it)

tmed. Singlet at  $\delta = 90.30$  represents the resonance of the alchenic C of the tta ring, while the singlets between  $\delta = 128$  and  $\delta = 132$  represent the resonances of the carbons of the thiophene ring of the same ligand. The singlet at  $\delta = 147.11$  is associated with the resonance of the thiophene carbons linked to the carbonilic groups, while the quartet at  $\delta = 119.89$  ( $^1J = 286.2$  Hz) is associated with the resonance of carbons of the  $-CF_3$  groups. Finally, the singlet at  $\delta = 185.27$  and the quartet at  $\delta = 173.04$  ( $^2J = 31.4$  Hz) represent resonances of the carbonilic carbons linked, respectively, to the thiophene ring and to the  $-CF_3$  group.

**Details of film deposition.** Films were deposited through spin coating of a 0.3 M solution of  $Cd(tta)_2 \bullet tmed$  complex on glass or Si substrates. Afterwards the films were treated under different temperatures and atmosphere, reactive using  $O_2$  or inert using  $N_2$ . The experimental conditions are summarized in Table S1.

**Table S1.** Relationship between conditions of thermal treatments and nature of Cd containing films.

| Temperature | Atmosphere | Treatment Time | Phase nature assessed through XRD | Elements of the films detected through EDX |
|-------------|------------|----------------|-----------------------------------|--------------------------------------------|
| 300-700°C   | $O_2$      | 1 h            | CdO                               | Cd, O                                      |
| 300-450 °C  | $N_2$      | 1 h            | $CdF_2$                           | Cd, F, S                                   |
| 450-550°C   | $N_2$      | 1 h            | CdS, $CdF_2$                      | Cd, F, S                                   |
| 550-600 °C  | $N_2$      | 1 h            | CdS                               | Cd, S                                      |

**Table S2.** Crystal data and structure refinement parameters for Cd(tta)<sub>2</sub>·tmed.

|                                           |                                                                                               |
|-------------------------------------------|-----------------------------------------------------------------------------------------------|
| Empirical formula                         | C <sub>22</sub> H <sub>24</sub> CdF <sub>6</sub> N <sub>2</sub> O <sub>4</sub> S <sub>2</sub> |
| M                                         | 670.95                                                                                        |
| T (K)                                     | 293                                                                                           |
| λ (Å)                                     | 0.71069                                                                                       |
| Crystal system, space group               | Monoclinic, P2 <sub>1</sub> /c                                                                |
| Unit cell dimensions (Å, °)               | a = 17.582(5)<br>b = 8.335(2), β = 92.61(3)<br>c = 18.610(7)                                  |
| Volume (Å <sup>3</sup> )                  | 2724.4(14)                                                                                    |
| Z, d <sub>calc</sub> (g/cm <sup>3</sup> ) | 4, 1.636                                                                                      |
| μ (mm <sup>-1</sup> )                     | 1.026                                                                                         |
| F(000)                                    | 1344                                                                                          |
| 2θ range for data collection (°)          | 5-50.                                                                                         |
| Reflections collected / unique            | 4804 / 4640 [R(int) = 0.0327]                                                                 |
| Data / parameters                         | 4640 / 339                                                                                    |
| Final R indices [I > 2σ(I)]               | R1 = 0.0510, wR2 = 0.1414                                                                     |
| R indices (all data)                      | R1 = 0.0553, wR2 = 0.1469                                                                     |

**Table S3.** Selected bond lengths [Å] and angles [°] for Cd(tta)<sub>2</sub>·tmed.

|                 |            |
|-----------------|------------|
| Cd(1)-O(1)      | 2.284(3)   |
| Cd(1)-O(2)      | 2.281(3)   |
| Cd(1)-O(3)      | 2.255(3)   |
| Cd(1)-O(4)      | 2.258(3)   |
| Cd(1)-N(1)      | 2.393(4)   |
| Cd(1)-N(2)      | 2.401(4)   |
| O(1)-Cd(1)-O(2) | 79.61(12)  |
| O(1)-Cd(1)-O(3) | 97.24(12)  |
| O(1)-Cd(1)-O(4) | 167.77(13) |
| O(1)-Cd(1)-N(1) | 94.25(13)  |
| O(1)-Cd(1)-N(2) | 97.98(14)  |
| O(2)-Cd(1)-O(3) | 103.57(14) |
| O(2)-Cd(1)-O(4) | 88.97(13)  |
| O(2)-Cd(1)-N(1) | 165.52(15) |
| O(2)-Cd(1)-N(2) | 90.43(16)  |
| O(3)-Cd(1)-O(4) | 81.08(12)  |
| O(3)-Cd(1)-N(1) | 90.15(15)  |
| O(3)-Cd(1)-N(2) | 160.94(15) |
| O(4)-Cd(1)-N(1) | 97.86(14)  |
| O(4)-Cd(1)-N(2) | 86.38(14)  |
| N(1)-Cd(1)-N(2) | 77.35(17)  |

**Figure S1.** EDX spectra of films obtained under different processing conditions: (a) CdO obtained at 600°C under O<sub>2</sub>, (b) CdF<sub>2</sub> obtained at 350°C under N<sub>2</sub>, (c) CdS obtained at 600°C under N<sub>2</sub>.

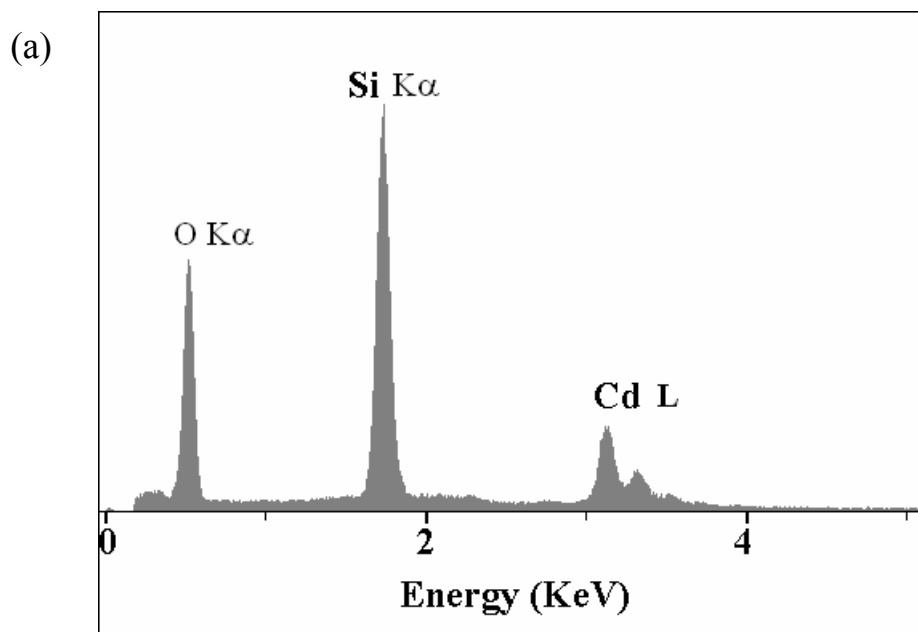

(b)

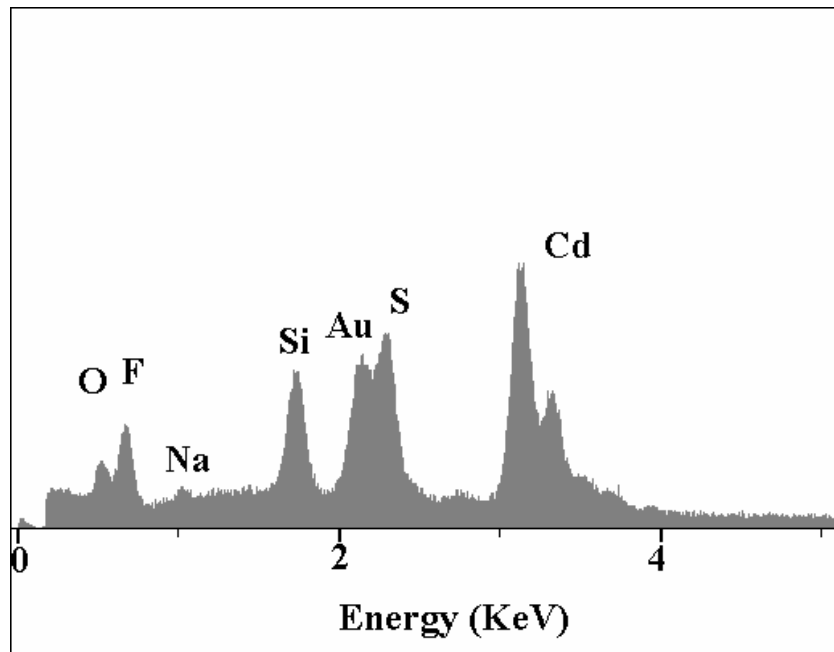

(c)

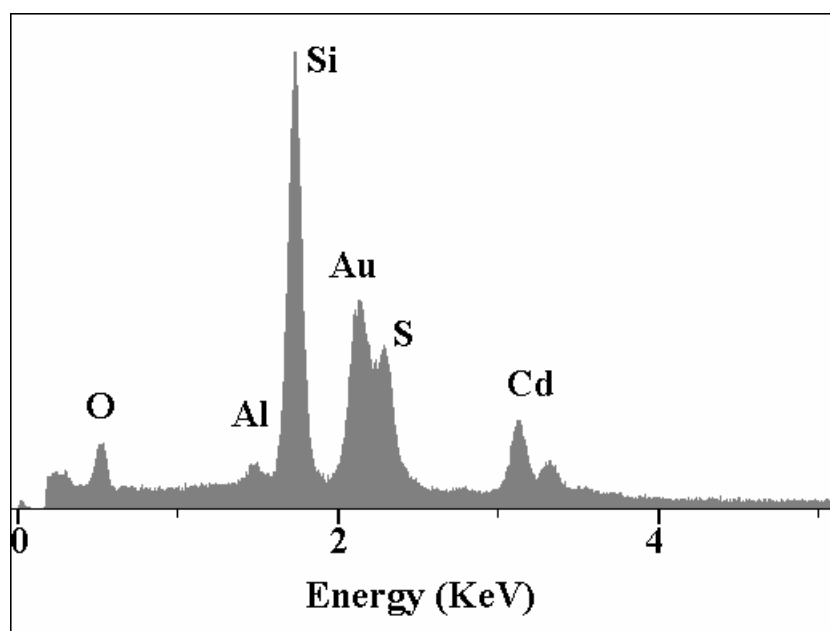

Supplement: b509623e.pdf [file b509623e.pdf]
